# Supplementary material
Source: PubMed Central journal article supplement (PMC7725911)
Supplement: NIHMS1598333-supplement-1.pdf [file NIHMS1598333-supplement-1.pdf]

**Supplemental Table 1. Primers used in this study.**

| <b>Genotyping</b>                      |         |                           |
|----------------------------------------|---------|---------------------------|
| RAR $\alpha$ -Tg                       | Forward | GATGCTGATGAAGATCACAG      |
|                                        | Reverse | GGACAATGAGTTTTCTGCTG      |
| Internal control<br>(RAR $\alpha$ -Tg) | Forward | TCAGCCCCTCACCCCTCCAAT     |
|                                        | Reverse | CTCACCTTACAGCCCTCACA      |
| Cre                                    | Forward | CGGTGATGCAACGAGTGATGAGG   |
|                                        | Reverse | CCAGAGACGGAAATCCATCGCTCG  |
| Internal control<br>(Cre)              | Forward | CTAGGCCACAGAATTGAAAGATCT  |
|                                        | Reverse | GTAGGTGGAAATTCTAGCATCATCC |
| Rara fl/fl                             | Forward | TCAGCCCCTCACCCCTCCAAT     |
|                                        | Reverse | CTCACCTTACAGCCCTCACA      |
| <b>qRT-PCR</b>                         |         |                           |
| <i>Rara</i>                            | Forward | CCTGCCCCGCATCTACAAG       |
|                                        | Reverse | GGTTCGGGTCACCTTGTT        |
| <i>Slc2a1 (Glut1)</i>                  | Forward | GTGACGATCTGAGCTACGGG      |
|                                        | Reverse | ACTCCTCAATAACCTTCTGGG     |
| <i>Glud1</i>                           | Forward | GCATCTTGGAGGCTGACTGT      |
|                                        | Reverse | GCACCCGATATCCTGTCCTG      |
| <i>Slc7a5 (Lat1)</i>                   | Forward | ATCGTGGGCACCATCATCG       |
|                                        | Reverse | CAGCTGTGAGGAGCAGCA        |
| <i>Icos</i>                            | Forward | TCATCTGTCAAACAACAGCGTC    |
|                                        | Reverse | AGGTCACACCTGCAAGTCTAGA    |
| <i>Actb</i>                            | Forward | AGAAGAGCTACGAGCTGCCTGAC   |
|                                        | Reverse | TACTCCTGCTTGCTGATCCACAT   |

## Supplemental Figures

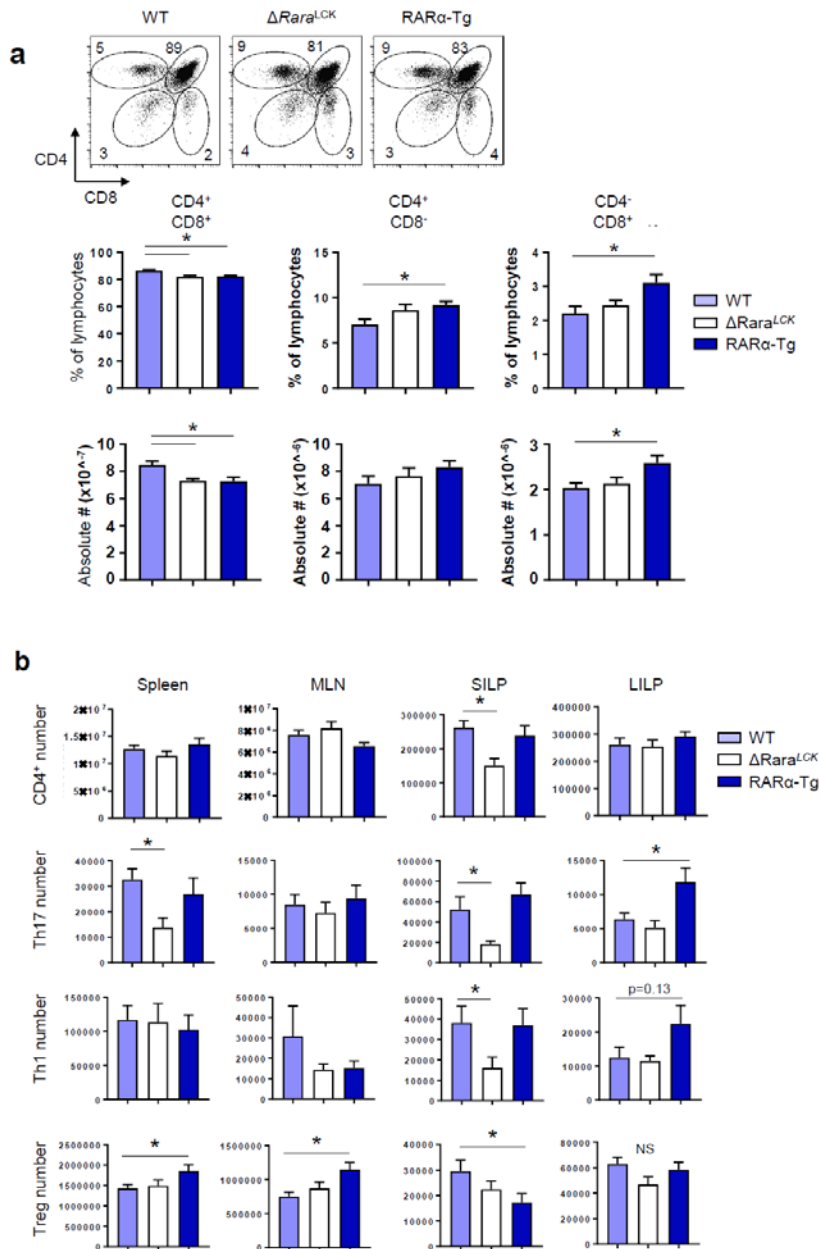

**Fig. S1. T lymphopoiesis and peripheral CD4<sup>+</sup> T subsets in WT,  $\Delta Rara^{LCK}$ , and RAR $\alpha$ -Tg mice.** (a) Thymic T cell populations in 6-8 week-old mice. (b) Total T helper, Treg, Th17, and Th1 cell numbers in spleen, MLN, small intestinal lamina propria (SILP), and large intestinal lamina propria (LILP) of WT,  $\Delta Rara^{LCK}$ , and RAR $\alpha$ -Tg mice. Representative and combined data (n=6-7) from at least 3 independent experiments are shown. All error bars indicate SEM. \*Significant differences ( $P$  values <0.05) between indicated groups as analyzed by one-way ANOVA with Bonferroni.

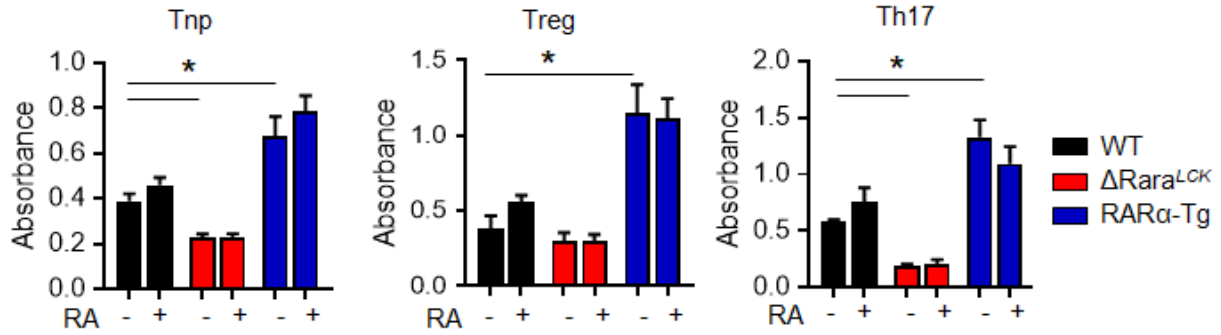

**Fig. S2. Proliferation of WT,  $\Delta Rara^{LCK}$ , and  $RAR\alpha$ -Tg cells.** XTT staining levels of cultured  $CD4^+$  T cells indicating cell proliferation at 72h. Combined data from 3 independent experiments are shown. All error bars indicate SEM. \*Significant differences ( $P$  values  $< 0.05$ ) between indicated groups as analyzed by two-way ANOVA with Bonferroni.

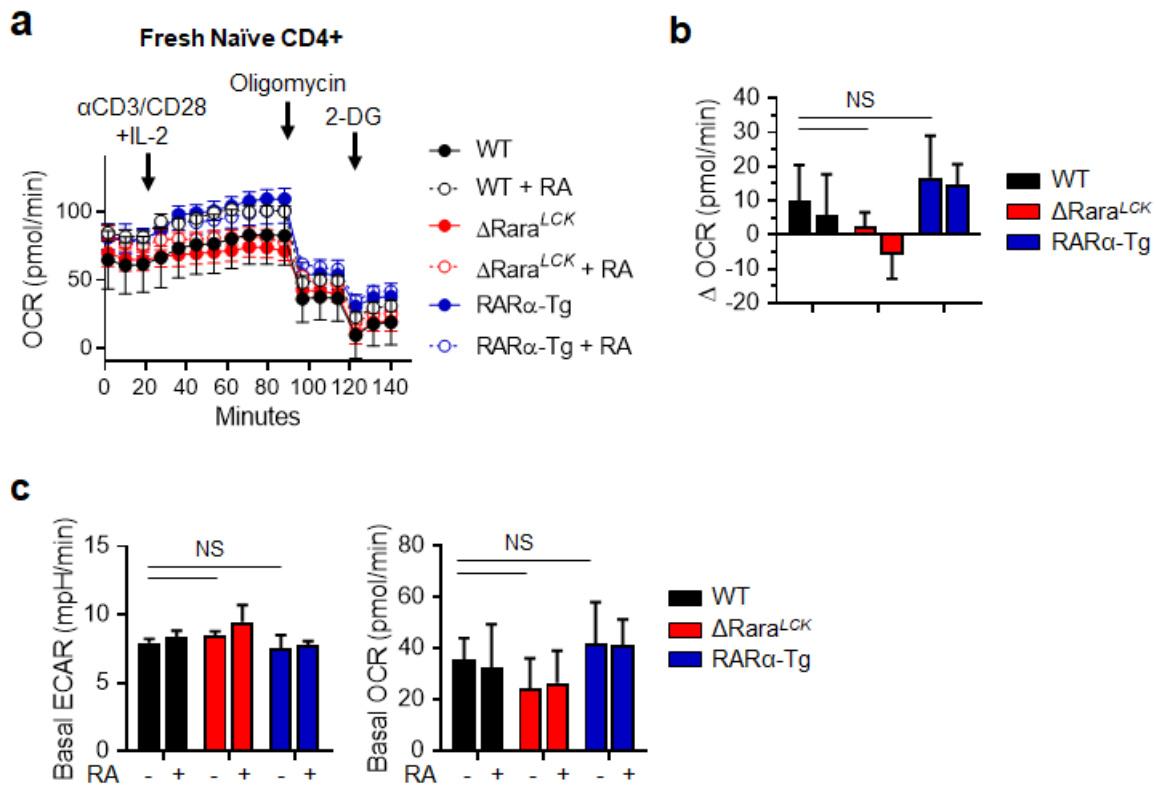

**Fig. S3. Impact of the  $RAR\alpha$  expression level on mitochondrial metabolism and basal ECAR and OCR.** (a) Seahorse assay OCR measurements of naïve  $CD4^+$  T cells upon anti-CD3/CD28 and IL-2 stimulation. (b) Changes in OCR ( $\Delta OCR$ ) during the first ~70 min period following activation. (c) Basal ECAR and OCR rates of naïve T cells prior to activation. Representative and combined data ( $n=3$  for a-c) are shown. All error bars indicate SEM. \*Significant differences ( $P$  values  $< 0.05$ ) from control or between two groups analyzed by repeated-measures two-way ANOVA with Bonferroni.

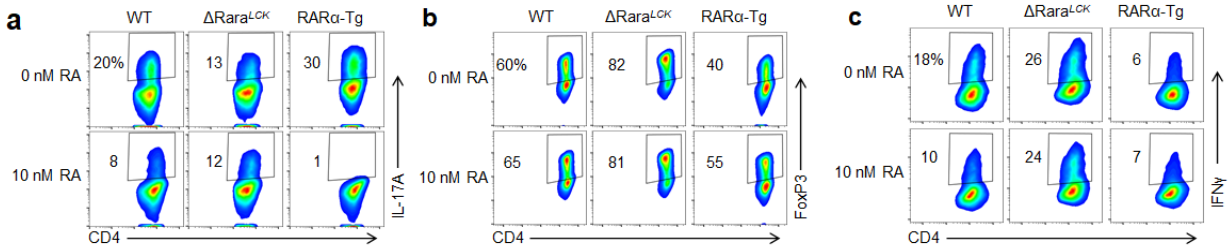

**Fig. S4. Impact of RAR $\alpha$  dose on Th cell polarization *in vitro*.** Naïve CD4<sup>+</sup> T cells, isolated from indicated mouse lines were cultured in a Th17 (a), Treg (b), or Th1 (c) polarization condition for 4 days. Representative flow dot plots are shown (n=3-5).

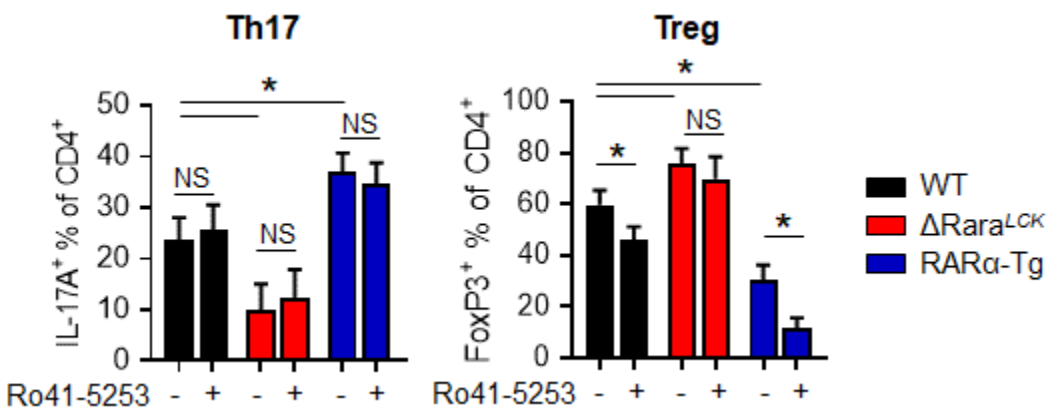

**Fig. S5. Impact of a RAR $\alpha$  antagonist (Ro41-5253) on Th17/Treg polarization in the low RA condition with charcoal-treated FBS.** Naïve CD4<sup>+</sup> T cells, isolated from indicated mice, were cultured for 4 days in a Th17 or Treg polarizing condition in the presence or absence of Ro41-5253 (100 nM). All error bars indicate SEM. \*Significant differences ( $P$  values <0.05) from control or between two groups analyzed by repeated-measures two-way ANOVA with Bonferroni.

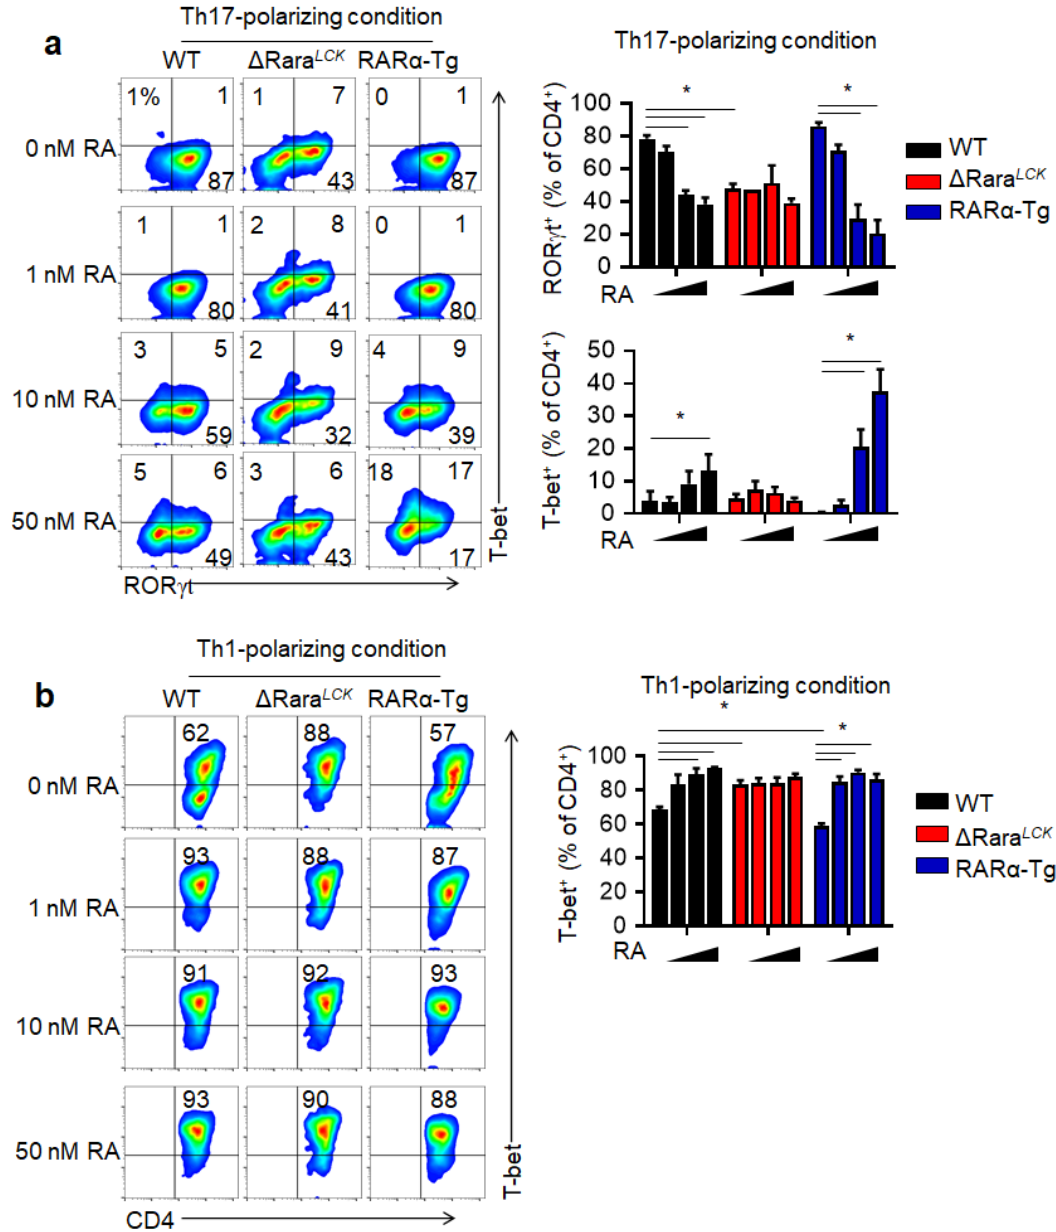

**Fig. S6. Impact of RAR $\alpha$  dose on Th cell polarization *in vitro*.** Naïve CD4<sup>+</sup> T cells, isolated from indicated mouse lines were cultured in a Th17 (a) or Th1 polarization condition for 4 days. (a) ROR $\gamma$ t and T-bet expression at day 4 in culture. (b) T-bet expression at day 4. Representative flow dot plots are shown (n=3). All error bars indicate SEM. \*Significant differences ( $P$  values <0.05) from control or between two groups analyzed by repeated-measures two-way ANOVA with Bonferroni.

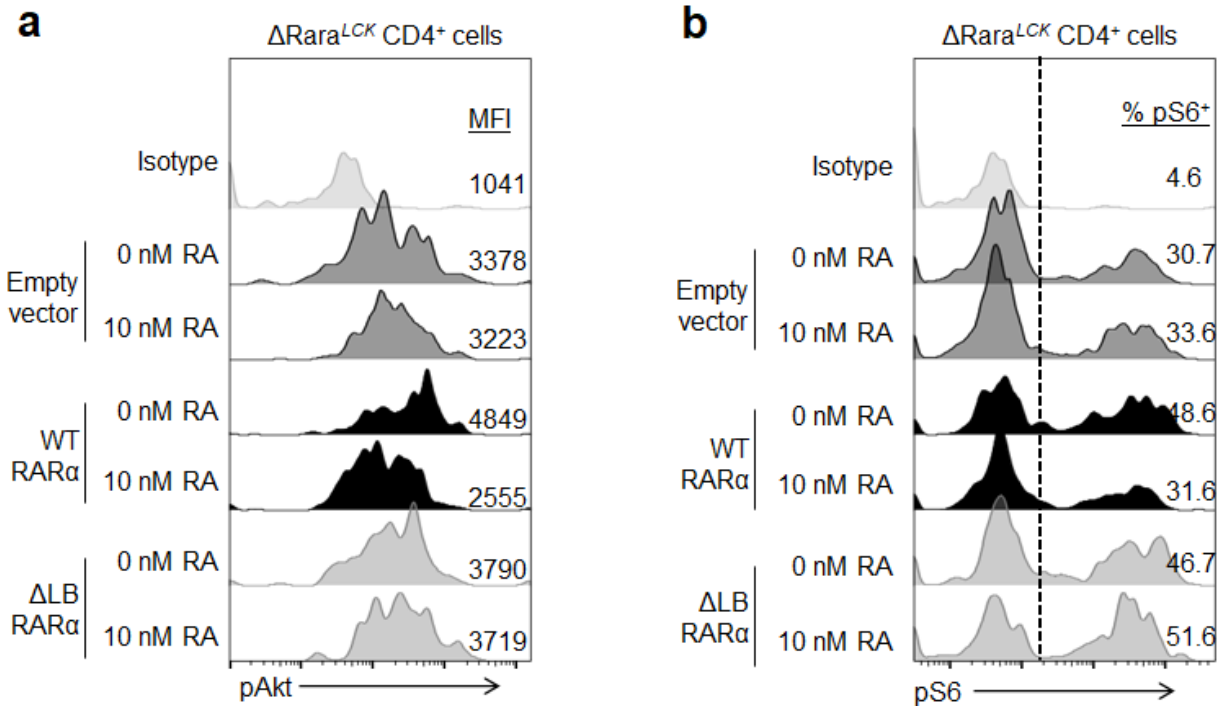

**Fig. S7. Impact of RAR $\alpha$  restoration on Akt and mTOR activity.** Naïve  $\Delta Rara^{LCK}$  CD4 T cells were transduced with retroviral vectors. (a, b) Cells were first cultured overnight with anti-CD3/CD28 activation, transduced, and rested for 24 h prior to reactivation with anti-CD3/CD28 and hIL-2 and flow cytometry analysis. Representative flow cytometry histograms are shown.

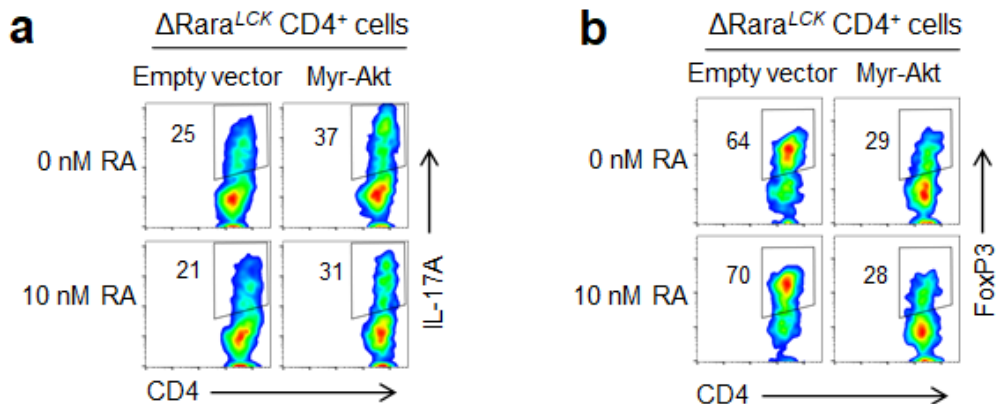

**Fig. S8. Impact of constitutively active Akt activity on Th17/Treg polarization.** Naïve  $\Delta Rara^{LCK}$  CD4 T cells were transduced with retroviral vectors. Cells were first cultured overnight with anti-CD3/CD28 activation, transduced, and cultured for 3 additional days in Th17 (a) or Treg (b) inducing condition. Representative flow cytometry dot plots are shown.

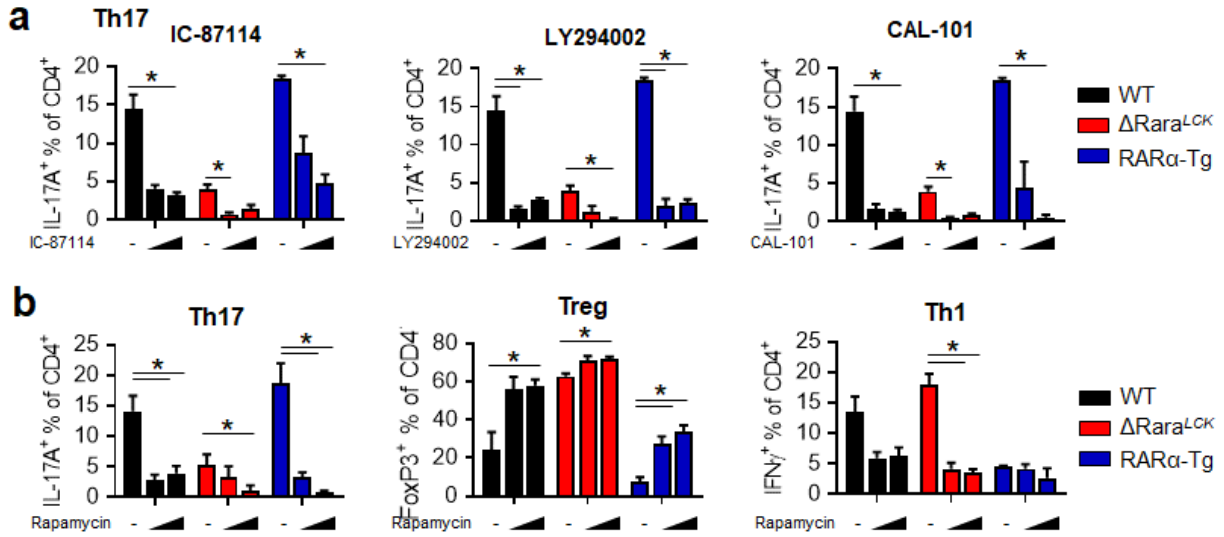

**Fig. S9. Impact of PI3K/Akt/mTOR inhibition on Th cell differentiation *in vitro*.** Naïve CD4<sup>+</sup> T cells, isolated from indicated mouse lines were cultured for 4 days in the presence of inhibitors (a) Th17 differentiation in the presence of IC-87114 (2 and 10 nM), LY294002 (2 and 10 nM), and CAL-101 (1 and 10 nM). (b) Th17, Treg, and Th1 polarization in the presence of rapamycin (5 and 25 nM). All error bars indicate SEM. \*Significant differences ( $P$  values <0.05) from control or between two groups analyzed by repeated-measures two-way ANOVA with Bonferroni.
